# Supplementary material
Source: HighWire-hosted journal article supplement (https://jitc.bmj.com/content/11/5/e006930)
Supplement: inline-supplementary-material-2 [file inline-supplementary-material-2.pdf]

A.

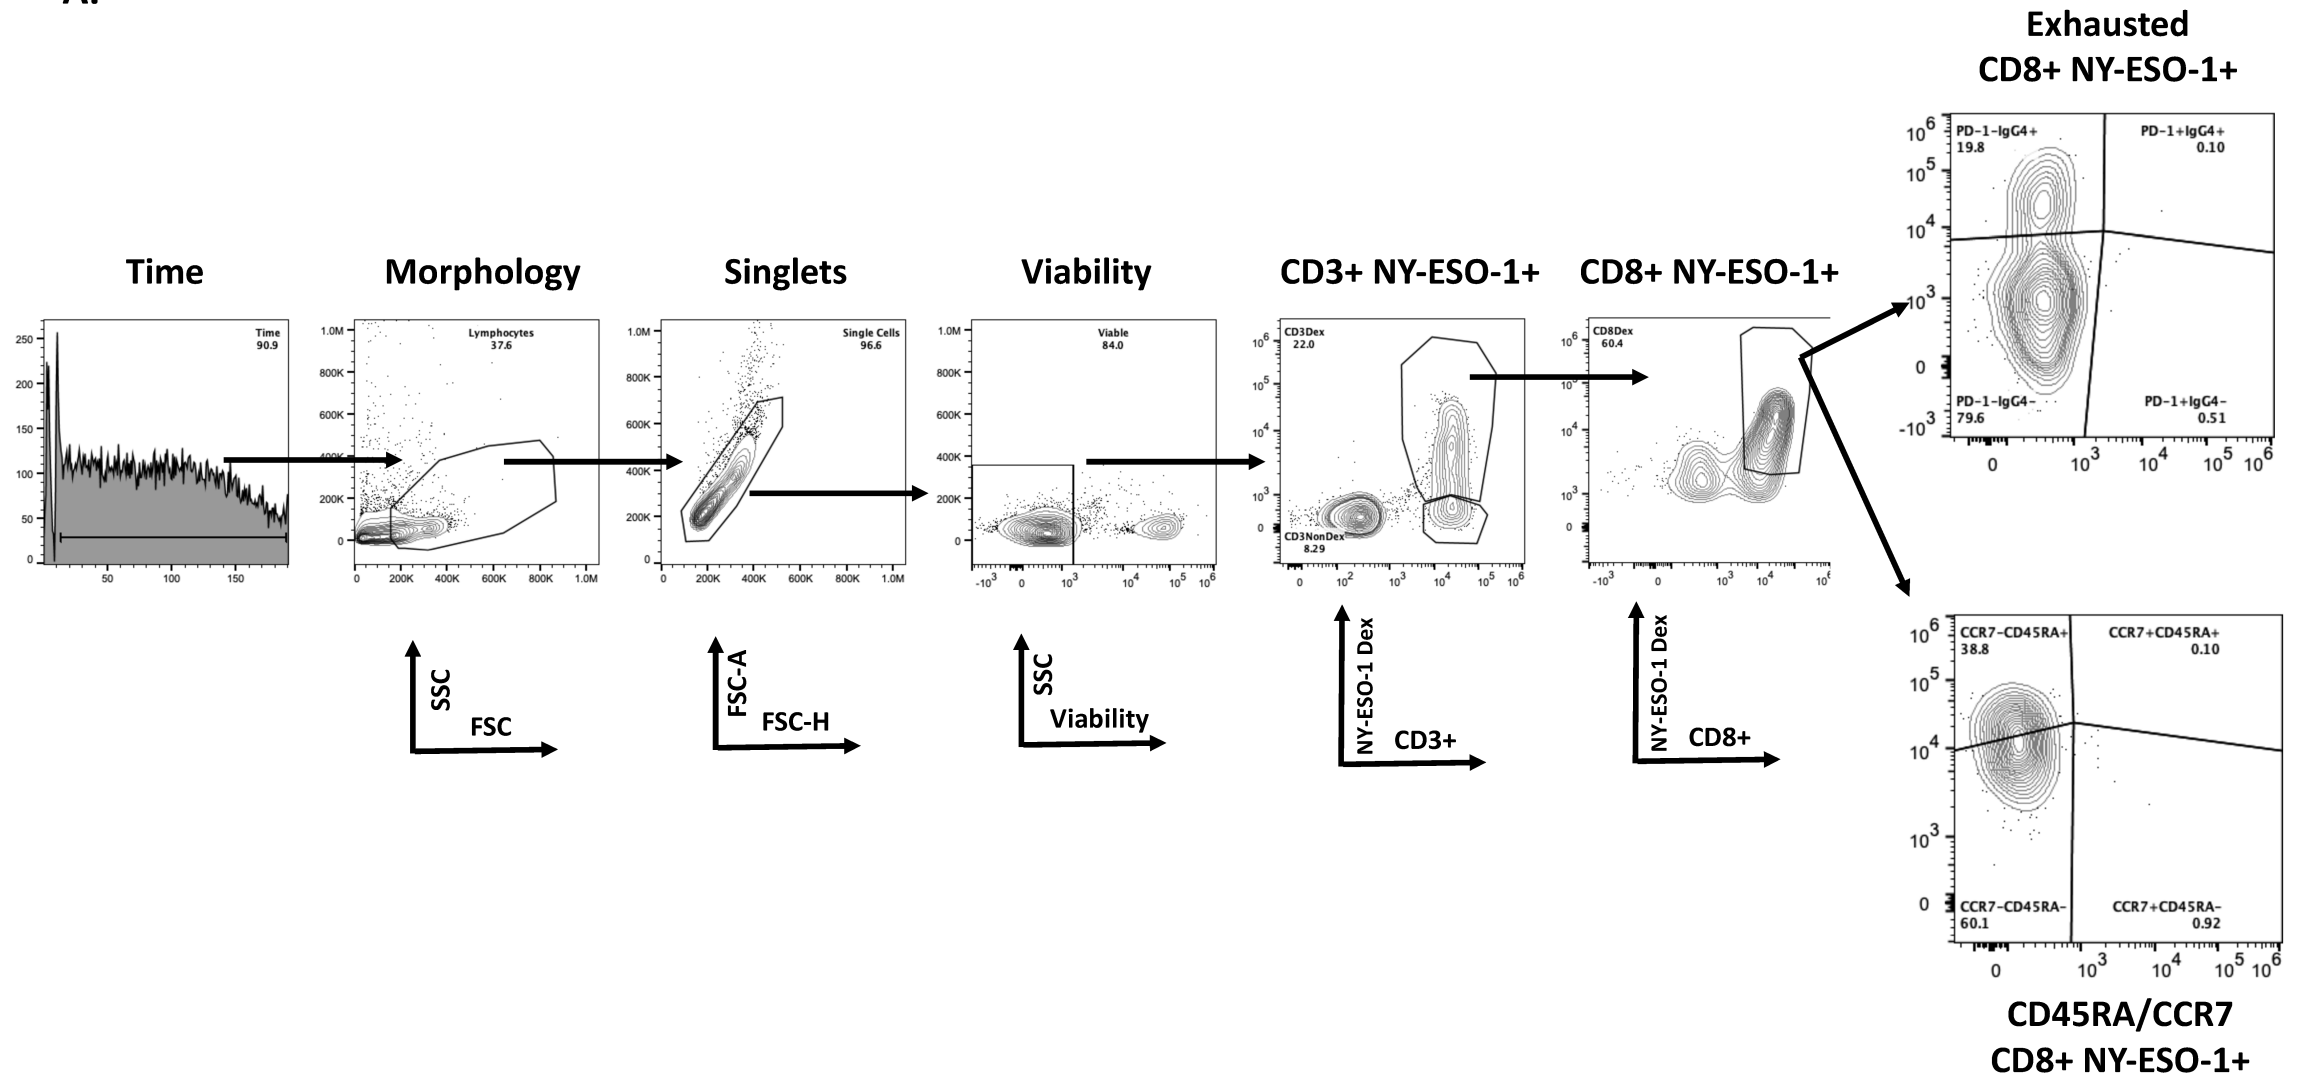

Figure S1

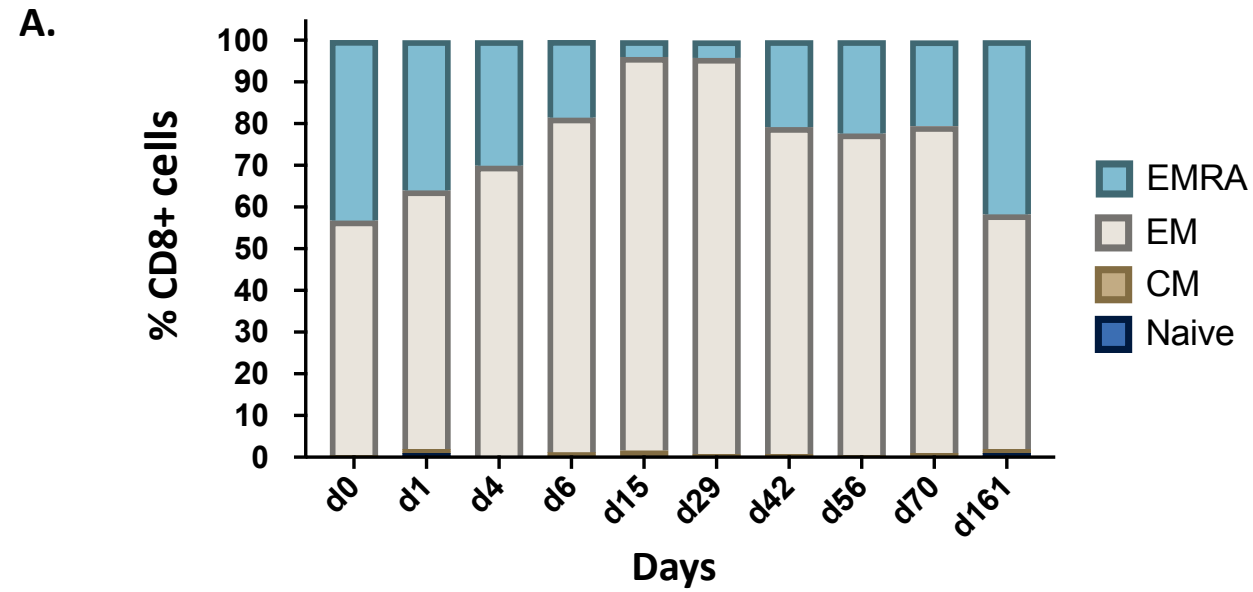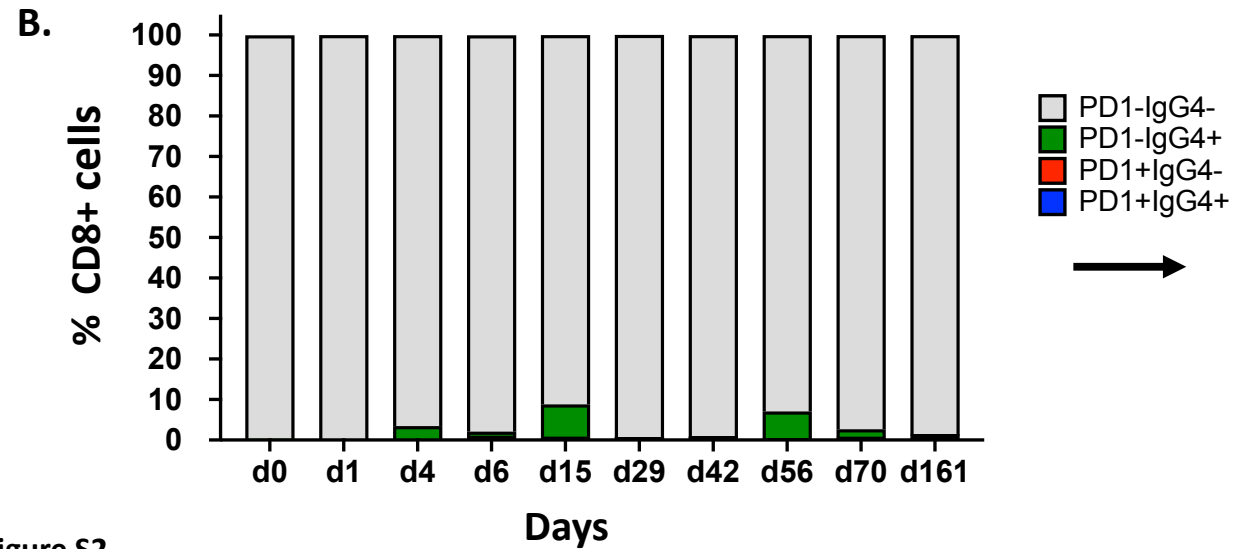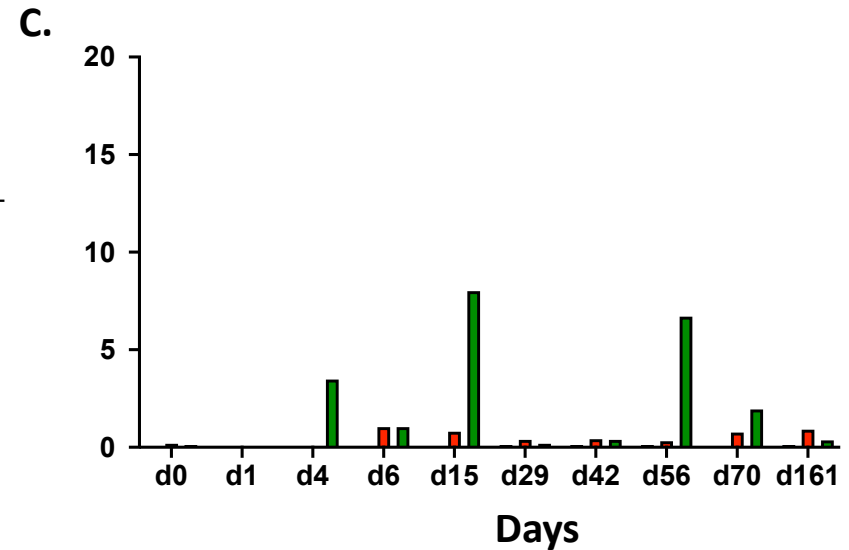

Figure S2

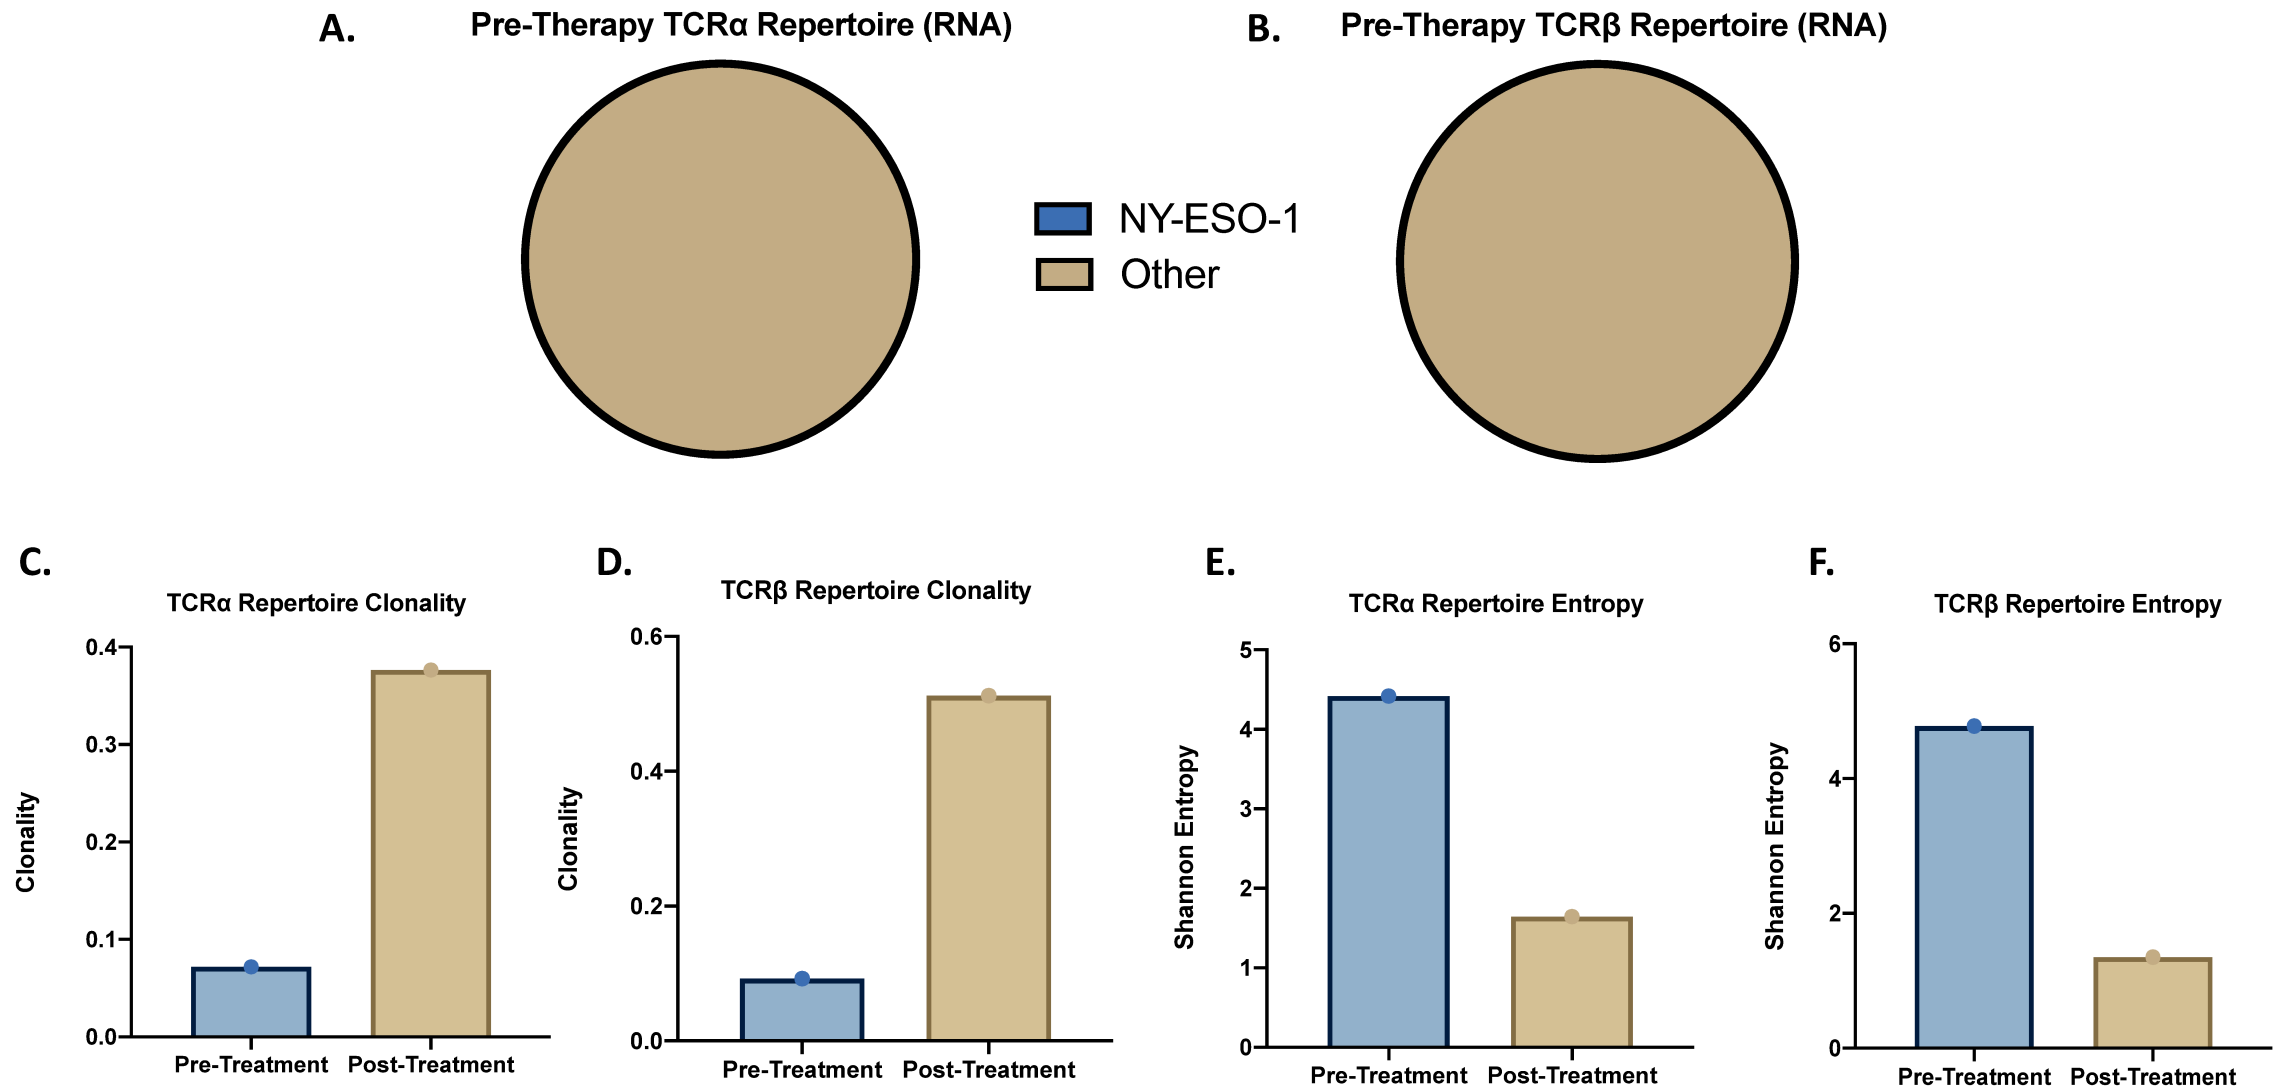

Figure S3.

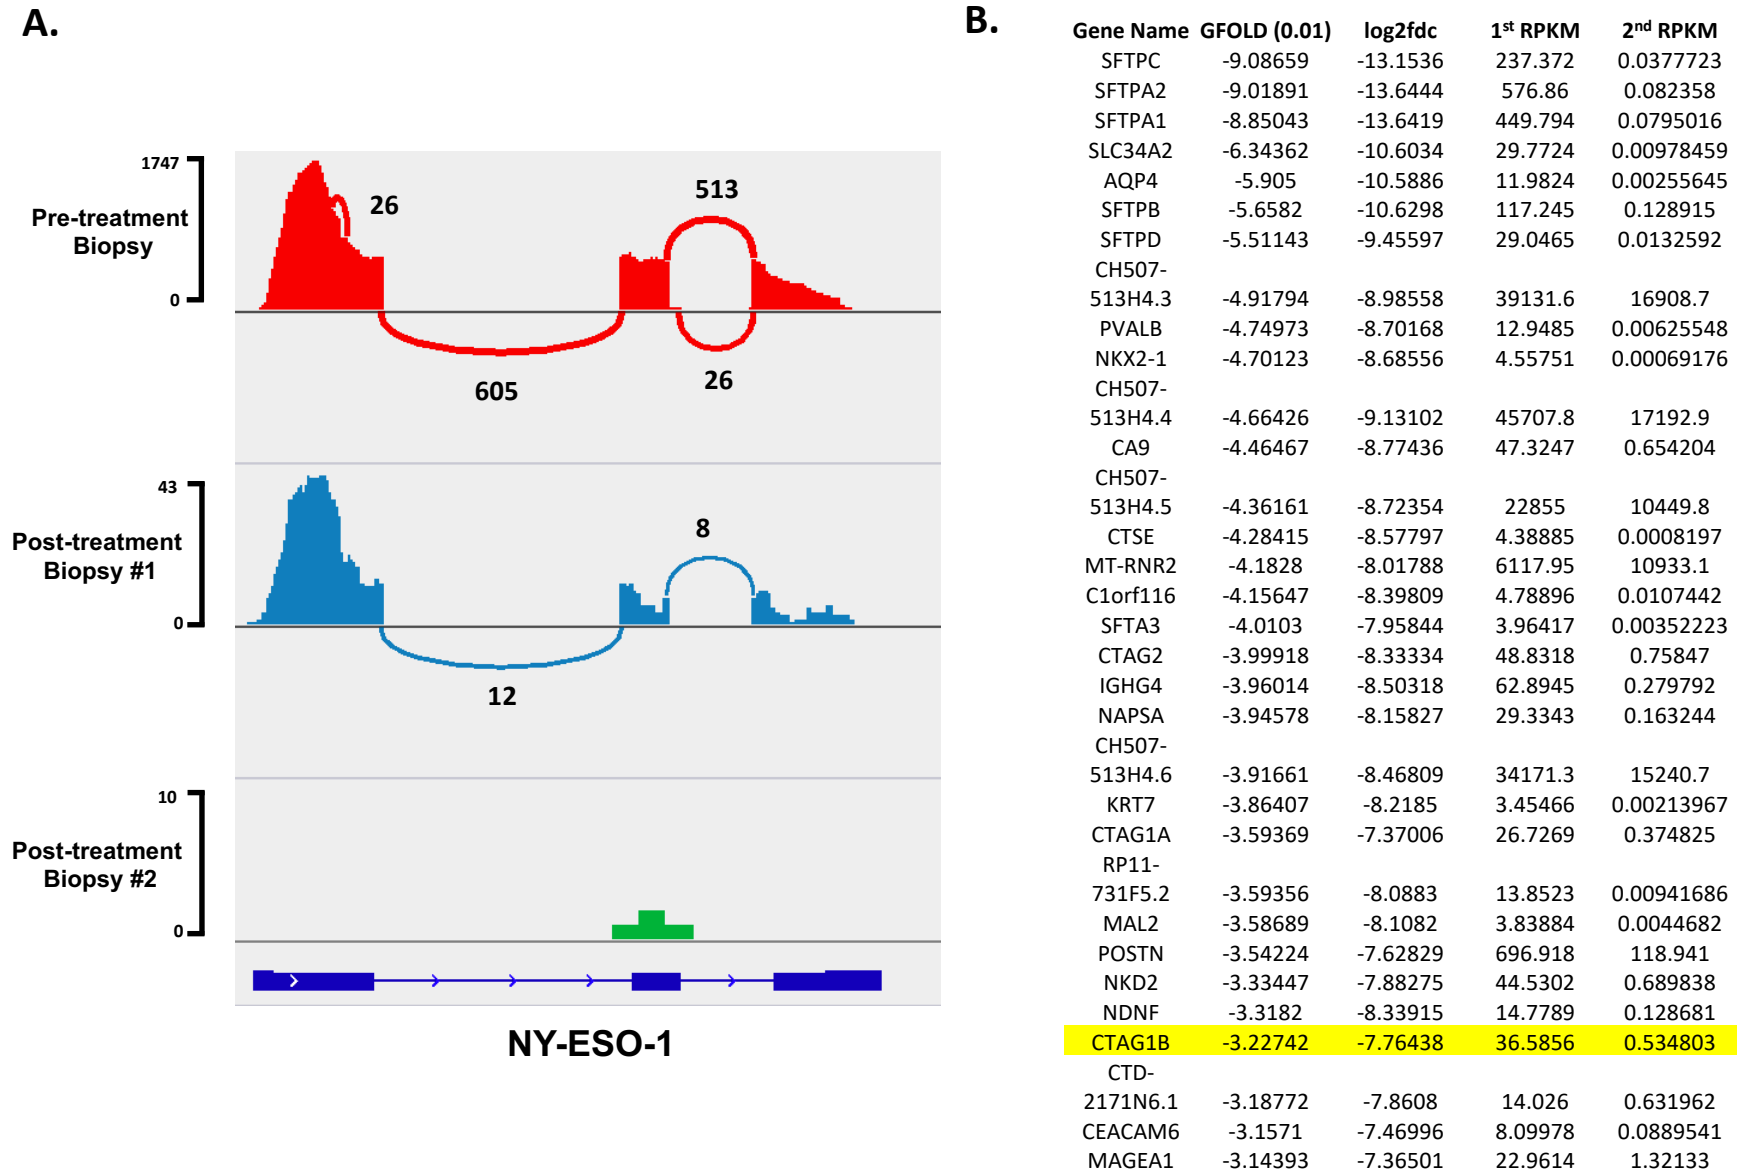

Figure S4.

| <b><u>Reagent</u></b>                             | <b><u>Fluorochrome</u></b> | <b><u>Clone</u></b> | <b><u>Vendor</u></b> |
|---------------------------------------------------|----------------------------|---------------------|----------------------|
| <b>CD3</b>                                        | AlexaFluor 488             | UCHT1               | Biolegend            |
| <b>Negative Dextramer HLA-*0201</b>               | PE                         | N/A                 | Immudex              |
| <b>NYESO-1 (HLA-A-*201) (SLLMWITQV) Dextramer</b> | PE                         | N/A                 | Immudex              |
| <b>CD19</b>                                       | PE/Cy5                     | HIB19               | Biolegend            |
| <b>CD19</b>                                       | PE                         | HIB19               | Biolegend            |
| <b>OneComp eBeads Compensation Beads</b>          | N/A                        | N/A                 | ThermoFisher         |
| <b>SYTOX AADVANCED DEAD CELL</b>                  | N/A                        | N/A                 | ThermoFisher         |
| <b>IgG4</b>                                       | AlexaFluor 647             | HP6025              | Southern Biotech     |
| <b>Mouse IgG1- Isotypec control for IgG4</b>      | AlexaFluor 647             | 15H6                | Southern Biotech     |
| <b>CD45RA</b>                                     | APC-FCy7                   | HI100               | Biolegend            |
| <b>CD279 (PD-1)</b>                               | Brilliant Violet 650       | MIH4                | BDBioscience         |
| <b>CD197(CCR7)</b>                                | Brilliant Violet 711       | G043H7              | Biolegend            |
| <b>CD8</b>                                        | Brilliant Violet 785       | RPA-T8              | Biolegend            |
| <b>CD39</b>                                       | Brilliant Violet 421       | A1                  | Biolegend            |

*APC – Allophycocyanin; PE-phycoerythrin*

**Supplementary Table 1**

| <b><u>Antibody</u></b> | <b><u>Vendor</u></b> | <b><u>Cat</u></b>  | <b><u>Clone</u></b> | <b><u>Antibody Dilution</u></b> | <b><u>Antigen retrieval</u></b> | <b><u>Incubation time</u></b> | <b><u>Opal dye</u></b> |
|------------------------|----------------------|--------------------|---------------------|---------------------------------|---------------------------------|-------------------------------|------------------------|
| <b>IgG4</b>            | Millipore            | 411492             | HP6025              | 1:200                           | ER2 20min                       | 30 mins                       | opal 620               |
| <b>CD8</b>             | DAKO                 | M7103              | C8/144B             | 1:100                           | ER2 20min                       | 30 mins                       | opal 480               |
| <b>PD-1</b>            | Cell Marque          | NAT105 315m-96     | NAT105              | 1:50                            | ER2 30min                       | 30 mins                       | opal 570               |
| <b>PDL-1</b>           | Spring/<br>Abcam     | M4420/<br>ab228462 | SP142               | 1:100                           | ER2 30min                       | 30 mins                       | opal 520               |
|                        |                      |                    |                     |                                 |                                 |                               |                        |
| <b>TLE1</b>            | Abcam                | ab183742           | EPR9386(2)          | 1:2000                          | ER1 20min                       | 30 mins                       | opal 690               |

**Supplementary Table 2**
